# Supplementary material
Source: HighWire-hosted journal article supplement (https://qualitysafety.bmj.com/content/33/5/301)
Supplement: inline-supplementary-material-3 [file inline-supplementary-material-3.pdf]

# Interview topic guide

## Managers and systems-level stakeholders

---

- Please can you describe your current role and how it relates to antenatal care? What is your job title?
- How has the provision of antenatal care in your service changed during the pandemic?
- What changes to the provision of antenatal care were decided by more senior colleagues, and how were these changes communicated to you?
- What changes to antenatal care were you involved in at a local level, and how did you communicate and implement these changes in your unit/trust?
- How (if at all) were service user groups such as MSLCs/MVP involved in decision making about these changes to antenatal care? Have you had any feedback from service users?
- Do you think any of these changes to remote antenatal care could have been improved?
- Did you create any local guidance? If so, please tell us about it.
- Have you noticed any impact from moving to remote antenatal care, and are these impacts being monitored?
- Do you have examples of what has worked well in remote antenatal care? What will you retain for future practice?
- What aspects of remote antenatal care don't work well or could be improved?
- How well do you feel that current remote antenatal care addresses the needs of pregnant women?

Version 2 2020-09-07

- Can you comment on how Black, Asian, or other Minority Ethnic groups and/or vulnerable women and families have been impacted?
- What are your thoughts about pregnant women doing some of their measurements at home as part of remote antenatal care?
- How well do you feel that current remote antenatal care addresses the needs of clinicians delivering care?
- What would you include in guidance for healthcare professionals for remote antenatal care?
- Is there anything else you wish to add about remote antenatal care that we have not discussed?

## Healthcare Professionals

---

- Please can you describe your current role and how it relates to antenatal care? What is your job title?
- Please describe how antenatal care has changed during the pandemic in your workplace?
- How was information about changes to antenatal care communicated to you? What information and communication would you have liked? Was there any training?
- Please describe how you have been providing antenatal care during the pandemic (in-person visits, telephone calls, video chats, email). What was covered in these appointments?
- Please tell us about managing remote and in-person appointments, including scheduling and attendance. If there were cases of missed appointments, what was the reason given?
- Can you tell us about keeping paper or electronic records whilst delivering remote antenatal care?
- Have you had concerns about the safety or acceptability of remote antenatal consultations?
- How do you think the quality of antenatal care during the pandemic compares to that beforehand?
- What has worked well in remote antenatal care? Please give examples.
- What will you retain for future practice?
- What aspects of remote antenatal care don't work well or could be improved? Please give examples.
- How well do you feel that current remote antenatal care addresses the needs of the pregnant women you care for?
- Can you comment on how Black, Asian and Minority Ethnic and/or vulnerable women and families have been impacted?

- Are women able to disclose anything they need to during remote antenatal consultations?
- What are your thoughts about pregnant women doing some of their measurements at home as part of remote antenatal care?
- What would you include in guidance for healthcare professionals for remote antenatal care?
- Is there anything else you wish to add about remote antenatal care that we have not discussed?

## Women and their families

---

### Background questions

- How old are you?
- How many times have you been pregnant?
- What is the first part of your postcode?
- What ethnic group do you identify as?
- How did you hear about the study?

### Current pregnancy status

- Can you tell me a bit more about your current pregnancy?
- How far along are you **OR** when did you give birth?
- Have you been pregnant before?
- What was it like for you to receive antenatal care during the pandemic?

### Antenatal experience

- What antenatal care have you received so far? Which parts of your care were remote (i.e. provided by phone, email or video call) and what was face-to-face.
  - What was covered in these?
  - Did you feel anything was missing?  
(*Chance to ask questions, feeling of being supported, opportunity to discuss worries, particular measurements, ability to physically show your care team something.*)
- Has your partner been able to attend any/all of your appointments?
- How have physical checks been carried out?
- How many appointments have you had?

- Did you have any information about these changes ahead of time **AND** what information did you receive about how remote antenatal care was to be provided?
- How easy is it to get hold of your midwife or antenatal care provider remotely? Any problems encountered?
- Were you able to see/contact the same midwife in multiple appointments?
- If applicable: how does this experience compare to your previous pregnancies?
- Have you missed any appointments? Why?  
(Due to lack of transport, anxieties around being in public/ at a medical centre/ catching coronavirus?)
  - Were they remote or in-person?
- How easy is it to raise concerns remotely? What response have you had?
- What barriers have you come across?
- Can you tell me about your experience of attending antenatal classes?
  - Were they remote or in-person?
- Have you been able to hold a record of your antenatal care? What has that been like?
- Have you felt safe?
- How have remote consultations impacted on your relationship with your antenatal care professionals/providers?

## Supplementing antenatal experience

- Have you sought antenatal care and advice elsewhere?  
*Searching online for information or reassurance, looking for external remote care, external in-person care (e.g. additional tests or ultrasound scans). To fill in gaps you've perceived in your antenatal care.*
- Where have you sought support outside of NHS antenatal care?

## What could change

- What has worked well and what hasn't worked so well?
- What parts of your antenatal care do you think should be done in-person??
- What would improve your remote antenatal appointments?

- What would improve your in-person antenatal appointments?

## What's important to you

- Do you feel that current remote antenatal care addresses your needs?
- Have you felt any loneliness or isolation receiving remote care?
- Have you been taking any measurements, such as blood pressure, at home? If yes, please tell me about it. If no, would you feel comfortable to do that?
- How would you like information about remote antenatal care to be communicated to you?  
(*E.g. leaflets, webpages, social media.*)
- What would you include in remote antenatal care guidance for professionals?

## Questions for birth partners/family members

- What has your experience been? Have you been able to ask questions, raise concerns?
- Were you able to be involved in any antenatal classes?

## Other issues

- Imagine you're speaking with someone newly pregnant, receiving antenatal care at your hospital:
  - How would you describe your experience of antenatal care during the pandemic to someone who is newly pregnant?
  - What advice would you give them about receiving remote antenatal care?
- Is there anything else you wish to add about your remote and in-person antenatal care that we have not discussed?
